# Supplementary material for: Real-time humidity-sensing properties of ionically conductive Ni(ii)-based metallo-supramolecular polymers
Source: Royal Society of Chemistry journal article supplement (doi:10.1039/c4ta00884g), 2014-01-01
Supplement: c4ta00884g1.pdf [file c4ta00884g1.pdf]

Supporting Information for

## **Real-time humidity-sensing properties of ionically conductive Ni(II)-based metallo-supramolecular polymers**

Rakesh K Pandey<sup>a</sup>, Md. Delwar Hossain<sup>a</sup>, Satoshi Moriyama<sup>b,c</sup>, and Masayoshi Higuchi<sup>\*,a,c</sup>

<sup>a</sup>Electronic Functional Materials Group, National Institute for Materials Science (NIMS), Tsukuba 305-0044 (Japan), <sup>b</sup>International Center for Materials Nanoarchitectonics (MANA), NIMS (Japan), <sup>c</sup>JST-CREST (Japan)

Table of Contents:

**Fig. S1.** (a-d) The refractive index data in the SEC-viscometry–RALLS measurement of acetonitrile solutions of **polyNi1-4** at room temperature.

**Fig. S2.** Ellipsometry data for a glass substrate without any polymer film.

**Fig. S3.** (a-d) Ellipsometry data for **polyNi1-4** films on a glass substrate. The thicknesses of the **polyNi1-4** films were determined to be 30.0, 46.1, 68.8 and 67.1 nm, respectively. The polymer films were prepared by drop-casting 10  $\mu\text{L}$  of the polymer solution (solvent: acetonitrile and ethanol (1:1), 2  $\text{mgml}^{-1}$ ).

**Fig. S4.** (a-d) *I-V* plots (forward and reverse sweeps) for **polyNi1-4** films at different temperatures.

**Fig S5.** A humidity sensor made from interdigitated Pt electrode, which can be fixed in a normal USB slot type for easy connection, bought from BAS Inc. Japan for humidity sensing experiment with a **polyNi1** thin film.

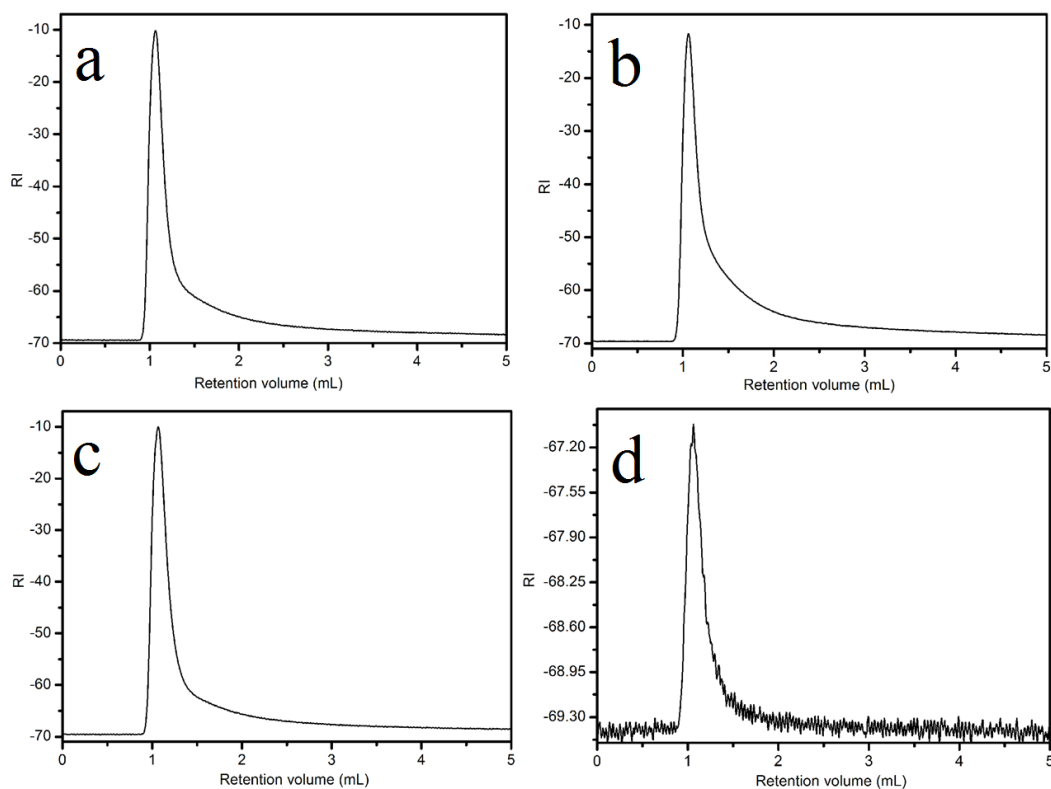

**Fig. S1.** (a-d) The refractive index data in the SEC-viscometry–RALLS measurement of acetonitrile solutions of **polyNi1-4** at room temperature.

### Ellipsometry

The detailed analysis of the ellipsometry experiment is explained below.

1. A glass substrate without any polymer film (Figure S3).
2. General oscillator model: thick film sample (an unknown very high concentration of a metallo-supramolecular polymer): Since the optical constants of such kind of metallo-supramolecular polymers were not available in the literature, we carried out additional experiment to measure the optical constant of such polymers. The model can be used for a variety of metallo-supramolecular polymer films.

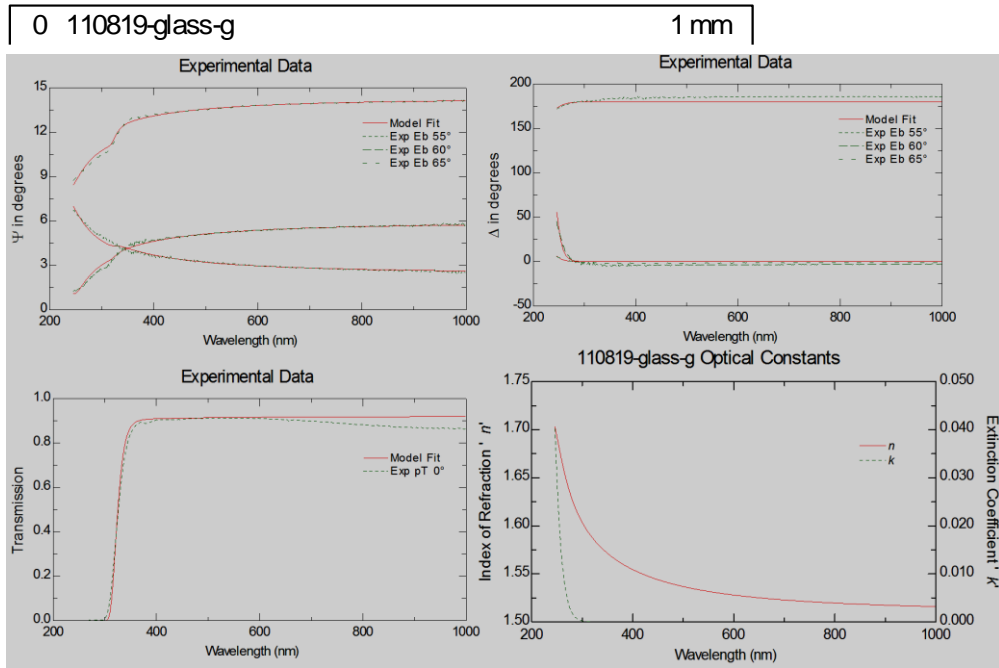

**Fig. S2.** Ellipsometry data for a glass substrate without any polymer film.

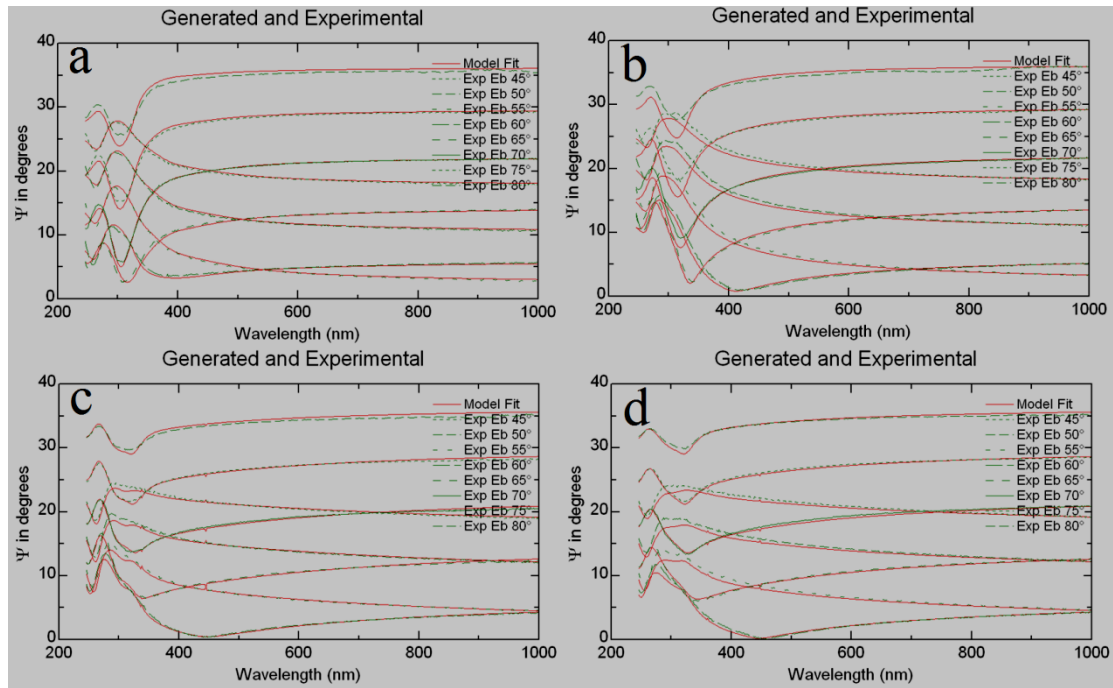

**Fig. S3.** (a-d) Ellipsometry data for **polyNi1-4** films on a glass substrate. The thicknesses of the **polyNi1-4** films were determined to be 30.0, 46.1, 68.8 and 67.1 nm, respectively. The polymer films were prepared by drop-casting 10  $\mu$ L of the polymer solution (solvent: acetonitrile and ethanol (1:1), 2  $\text{mgml}^{-1}$ ).

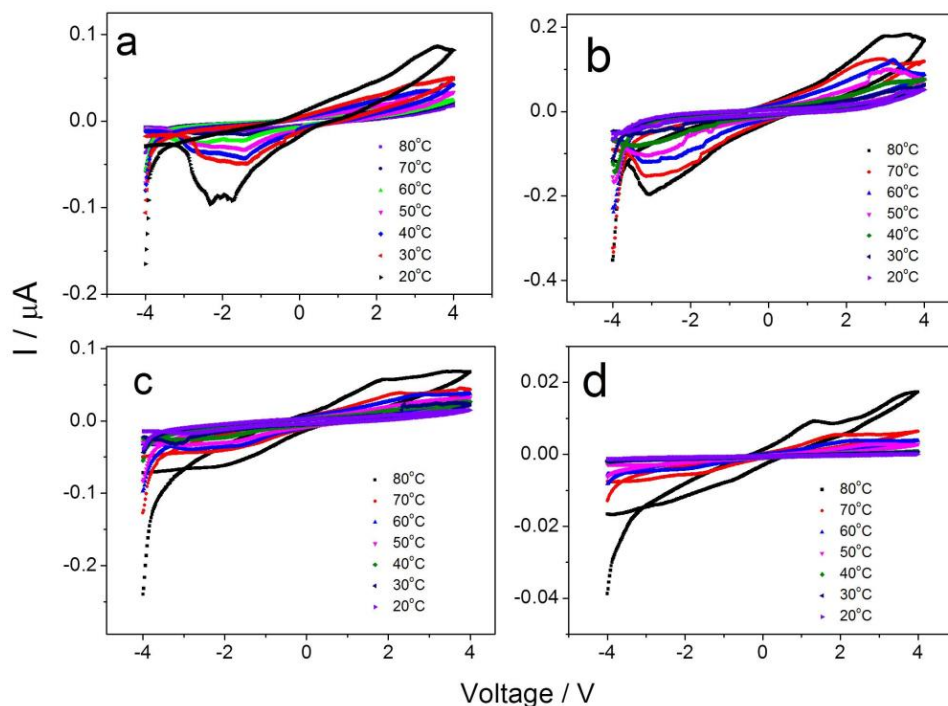

**Fig. S4.** (a-d)  $I$ - $V$  plots (forward and reverse sweeps) for **polyNi1-4** films at different temperatures.

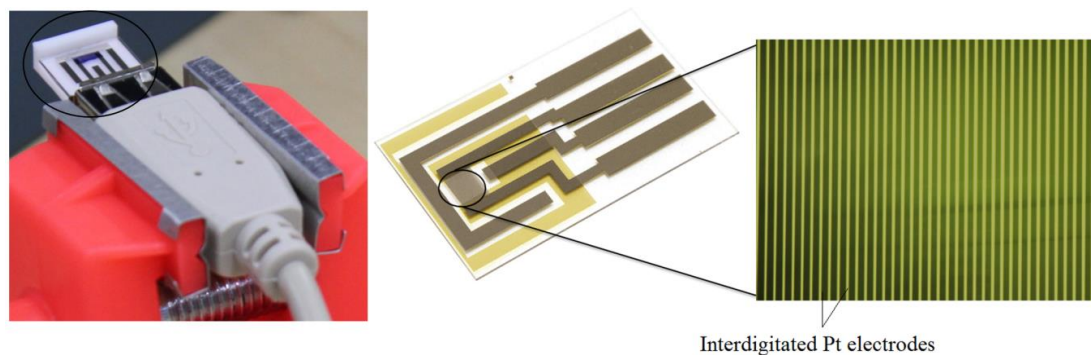

**Fig. S5.** A humidity sensor using an interdigitated Pt electrode, which can be fixed in a normal USB slot type for easy connection, bought from BAS Inc. Japan for humidity sensing experiment with a **polyNi1** thin film.

#### References:

- (1) (a) A. A. Mohammed, **2008**, <http://www.iasj.net/iasj?func=fulltext&aId=39056>.  
 (b) C. C. Addison, B. M. Gatehouse *J. Chem. Soc.* 1960, 613.
- (2) [http://research-archive.liv.ac.uk/1362/16/McIntyreLau\\_Oct\\_2009\\_1362\\_\(Part\\_8\)](http://research-archive.liv.ac.uk/1362/16/McIntyreLau_Oct_2009_1362_(Part_8)).
- (3) C. B. Jong, H. H. Chung *Bull. Korean Chem. Soc.* 2005, **26**, 1395.
- (4) M. Chiper, M. A. R. Meier, J. M. Johannes, U. S. Schubert *Macromol. Chem. Phys.* 2007, **208**, 679.
